# Supplementary material for: Thin-walled, mesoporous and nitrogen-doped hollow carbon spheres using ionic liquids as precursors
Source: Royal Society of Chemistry journal article supplement (doi:10.1039/c2ta01013e), 2012-11-30
Supplement: c2ta01013e.pdf [file c2ta01013e.pdf]

## Supporting Information

# Thin-walled, mesoporous and nitrogen-doped hollow carbon spheres using ionic liquids as precursors

Aibing Chen,<sup>a</sup> Yifeng Yu,<sup>\*a</sup> Haijun Lv,<sup>a</sup> Yanyan Wang,<sup>a</sup> Shufeng Shen,<sup>a</sup> Yongqi Hu,<sup>a</sup>

Bo Li,<sup>a</sup> Yue Zhang<sup>a</sup> and Jian Zhang<sup>\*b</sup>

<sup>a</sup> College of Chemical and Pharmaceutical Engineering, Hebei University of Science and Technology, Shijiazhuang 050018,

China. Fax: +86-311-88632183; Tel: +86-311-88632183; E-mail: kdyf@163.com

<sup>b</sup> Ningbo Institute of Materials Technology & Engineering, Chinese Academy of Sciences, Ningbo 315201, China. E-mail:

jzhang@nimte.ac.cn

### The N<sub>2</sub> adsorption–desorption isotherms of HCSs

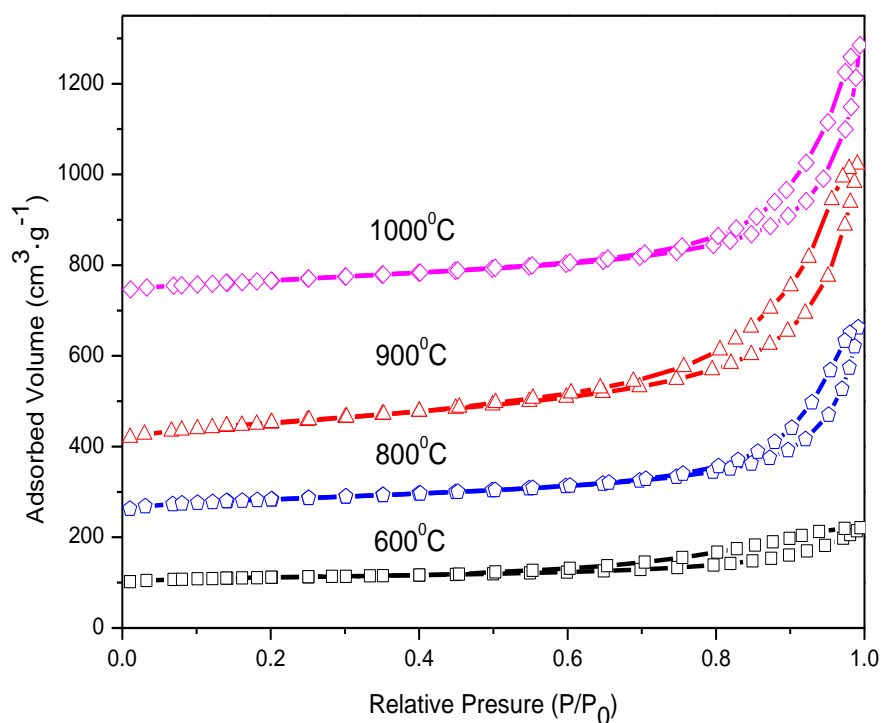

**Fig. S1.** The N<sub>2</sub> absorption/desorption isotherm of HCSs carbonized at 600-1000°C.
